# Supplementary material for: O-Polysaccharide Plays a Major Role on the Virulence and Immunostimulatory Potential of Aggregatibacter actinomycetemcomitans During Periodontal Infection
Source: PubMed Central journal article supplement (PMC7662473; doi:10.3389/fimmu.2020.591240), 2020-10-30
Supplement: DataSheet_1.pdf [file DataSheet_1.pdf]

## Supplementary Figure S1

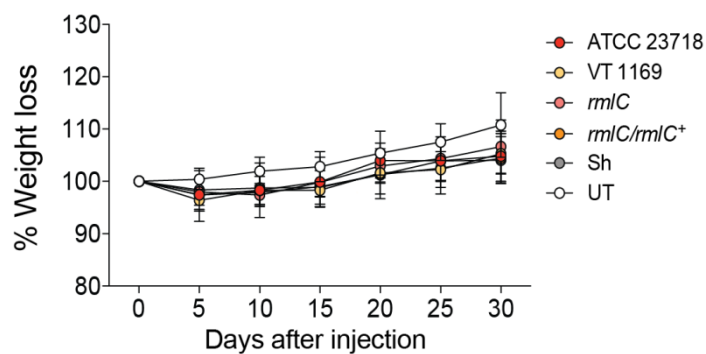

**SUPPLEMENTARY FIGURE S1. Percentage of body-weight loss in periodontally infected mice.** Measurements of body-weight loss in mice infected with *A. actinomycetemcomitans* ATCC 23718, VT1169, *rmlC*, or *rmlC/rmlC*<sup>+</sup> strains, and sham-infected (Sh) and untreated (UT) controls. 100% is considered as the body-weight of each mouse at the initial time-point (n=4).

## Supplementary Figure S2

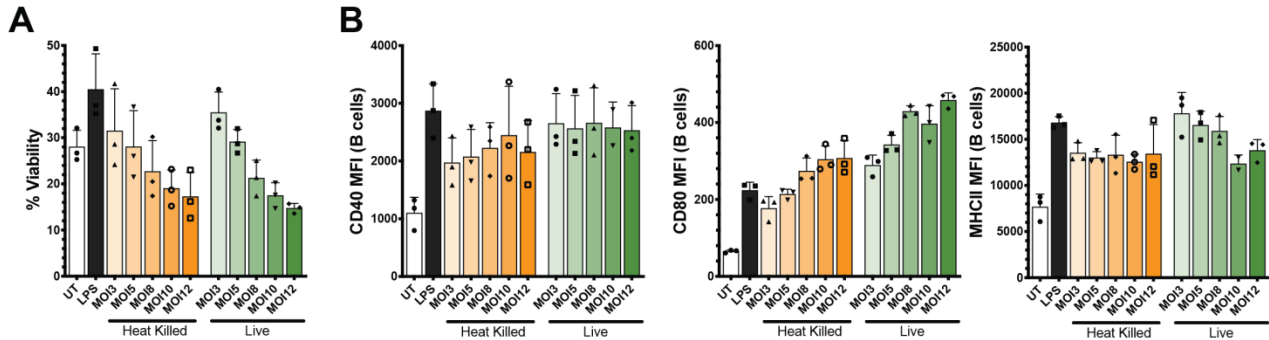

**SUPPLEMENTARY FIGURE S2. Dose-response *in vitro* assays of splenocytes stimulated with increasing multiplicity of infection of heat-killed or live *A. actinomycetemcomitans* VT1169 strain.** (A) Percentage of live splenocytes stimulated at different multiplicity of infections (MOI=3, MOI=5, MOI=8, MOI=10, or MOI=12) of heat-killed or live *A. actinomycetemcomitans* VT1169 strain for 20 h (n=3). Splenocytes stimulated with *E.coli*-derived LPS (LPS) and untreated (UT) cells were used as controls (n=3). (B) Mean fluorescence intensity (MFI) levels of the co-stimulatory molecules CD40, CD80, and MHCII from the same conditions described in A. The data were pooled from two independent experiments. Error bars represent SEM in all panels.

### Supplementary Figure S3

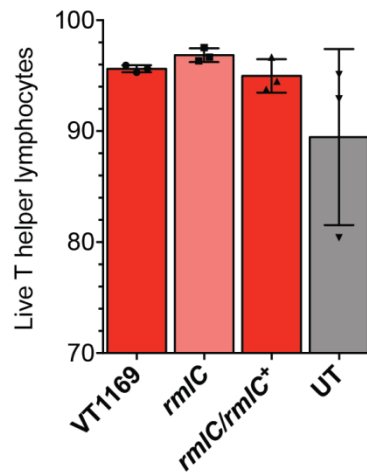

**SUPPLEMENTARY FIGURE S3. T helper lymphocyte viability in the periodontal lesions induced with the *A. actinomycetemcomitans* VT1169, *rmlC*, or *rmlC/rmlC*<sup>+</sup> strains.** Percentage of live T helper lymphocytes from the total CD45<sup>+</sup>CD3<sup>+</sup>CD4<sup>+</sup> cells obtained from periodontal tissues of mice infected with the *A. actinomycetemcomitans* VT1169, *rmlC*, and *rmlC/rmlC*<sup>+</sup> strains, and untreated (UT) controls (n=3). The data were pooled from three independent experiments. Mean  $\pm$  SD, one-way ANOVA, and Holm-Sidak post-hoc test. Error bars represent SEM.

## Supplementary Figure S4

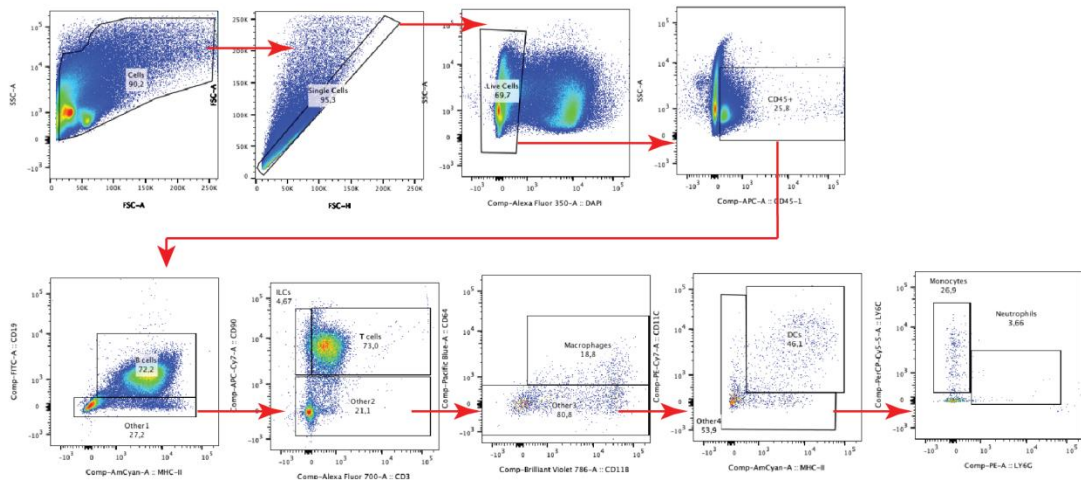

**SUPPLEMENTARY FIGURE S4.** Flow cytometry gating strategy used for periodontal tissues immune cell compartment characterization.

## Supplementary Figure S5

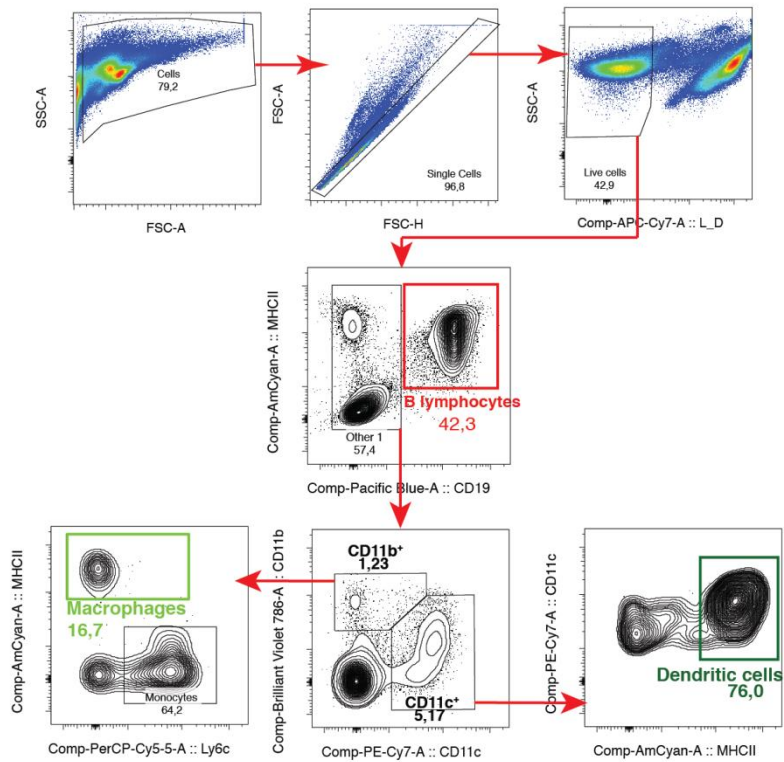

**SUPPLEMENTARY FIGURE S5.** Flow cytometry gating strategy used for the *in vitro* experiments with total splenocytes.

## Supplementary Figure S6

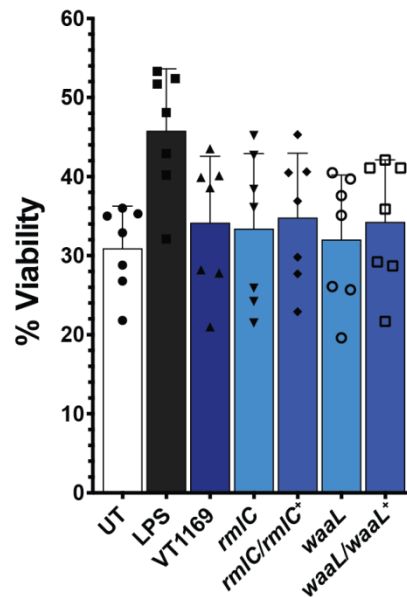

**SUPPLEMENTARY FIGURE S6. Splenocytes viability upon challenge with the *A. actinomycetemcomitans* VT1169, *rmlC*, *rmlC/rmlC*<sup>+</sup>, *waaL*, or *waaL/waaL*<sup>+</sup> strains.** Percentage of live splenocytes stimulated at a multiplicity of infection MOI=3 with the *A. actinomycetemcomitans* VT1169, *rmlC*, *rmlC/rmlC*<sup>+</sup>, *waaL*, or *waaL/waaL*<sup>+</sup> strains for 20 h (n=7). Splenocytes stimulated with *E. coli*-derived LPS (LPS) and untreated (UT) cells were used as controls (n=7). The data were pooled from three independent experiments. Mean ± SD, one-way ANOVA, and Tukey post-hoc test. Error bars represent SEM.

## Supplementary Table S1

**SUPPLEMENTARY TABLE S1** Forward and reverse primers used for amplifications by qRT-PCR.

| Primer                   | Forward                  | Reverse                  |
|--------------------------|--------------------------|--------------------------|
| <i>Aa 16S rDNA</i>       | cggaaatggaatgcttgc       | ctgaggaagcctagcaat       |
| <i>Ahr</i>               | gccaaagagcttctttgatgg    | tgctgaaagcccaggtaate     |
| <i>Hprt</i>              | tcagtcaacgggggacataaa    | ggggctgtactgcttaaccag    |
| <i>Ifng</i>              | ggaggaactggcaaaaggat     | ttcaagacttcaaagagtctgagg |
| <i>Il-1b</i>             | agttgacggaccccaaaag      | tttgaagctggatgctctcat    |
| <i>Il-23</i>             | tgttgcctgggtcactc        | gagcccagtcaggactgcta     |
| <i>Il-6</i>              | tgatggatgctaccaactgg     | ttcatgtactccaggtagctatgg |
| <i>Il-10</i>             | cagagccacatgctcctaga     | tgccagctggctcctttgt      |
| <i>Il-17</i>             | cagggagagcttcatctgtgt    | gctgagctttgagggatgat     |
| <i>Il-22</i>             | gtggagagatcaaggcgatt     | cagacgcaagcatttctcag     |
| <i>Il-23</i>             | agcttcatgcctcctactg      | ctgctgagtctcccagtggt     |
| <i>Tlr2</i>              | ggggcttcaactctctgctt     | agcatcctctgagatttgacg    |
| <i>Tlr4</i>              | ggactctgatcatggcactg     | ctgatccatgcattggtaggt    |
| <i>Tnfa</i>              | ctgtagcccacgtcgtagc      | ttgagatccatgccgttg       |
| RANKL ( <i>Tnfsf11</i> ) | tgaagacacactacctgactcctg | cccacaatgtgttcagttc      |
| <i>18s</i>               | gcaattattcccatgaacg      | gggacttaatcaacgcaagc     |

*Aa*, *Aggregatibacter actinomycetemcomitans*; *Ahr*, transcription factor aryl hydrocarbon receptor; *Hprt*, hypoxanthine phosphoribosyl transferase 1; *Ifng*, interferon-gamma; *Il*, interleukin; RANKL, receptor-activator of nuclear factor  $\kappa$ B ligand; *Tlr*, toll-like receptor; *Tnfa*, tumor necrosis factor-alpha; *Tnfsf*, tumor necrosis factor super-family 11.
